# Supplementary material for: Chromatin Loops as Allosteric Modulators of Enhancer-Promoter Interactions
Source: PubMed Central journal article supplement (PMC4207457; doi:10.1371/journal.pcbi.1003867), 2014-10-23

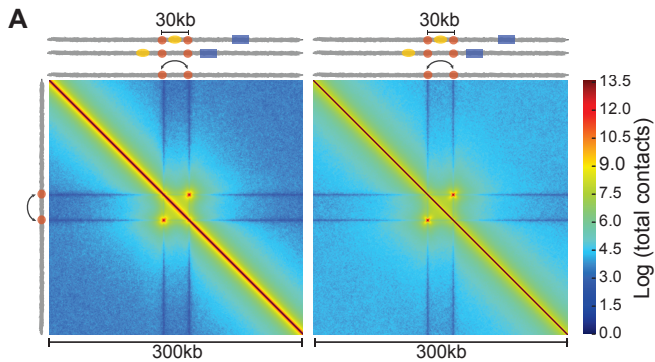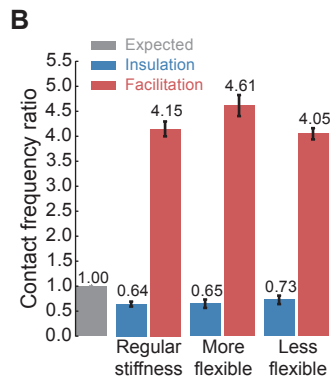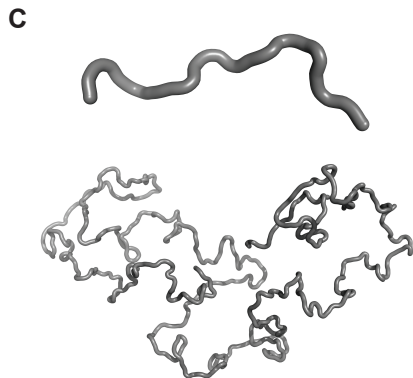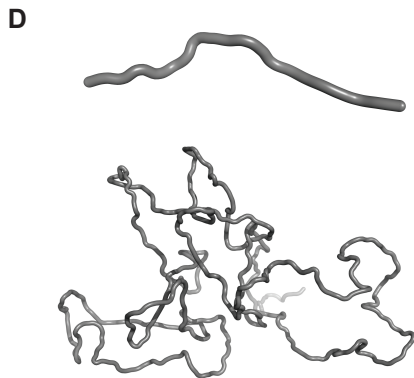

Supplement: pcbi.1003867.s003.pdf [file pcbi.1003867.s003.pdf]
